# Supplementary material
Source: ML conference proceedings conference paper supplement (https://proceedings.neurips.cc/paper_files/paper/2018/hash/02ed812220b0705fabb868ddbf17ea20-Abstract.html)
Supplement: Supplementary file [file 02ed812220b0705fabb868ddbf17ea20-Supplemental.zip]

## Appendices

### A Survey propagation subroutines

Here, we provide details regarding the subroutines regarding the message passing updates SP-Update [Line 6] and the marginalization procedure Marginalize [Line 9] used in Algorithms 1 and 2.

---

**Algorithm 3** SP-Update( $V, C, \{\eta_{a \rightarrow i}\}$ )

---

```

1: for all  $a \in C, i \in V(a)$  do
2:   for all  $j \in V(a) \setminus i$  do
3:      $\eta_{j \rightarrow a}^u \leftarrow \left[ 1 - \prod_{b \in C_a^u(j)} (1 - \eta_{a \rightarrow j}) \right] \prod_{b \in C_a^s(j)} (1 - \eta_{a \rightarrow j})$ 
4:      $\eta_{j \rightarrow a}^s \leftarrow \left[ 1 - \prod_{b \in C_a^s(j)} (1 - \eta_{a \rightarrow j}) \right] \prod_{b \in C_a^u(j)} (1 - \eta_{a \rightarrow j})$ 
5:      $\eta_j^0 \leftarrow \prod_{b \in C(j) \setminus a} (1 - \eta_{a \rightarrow j})$ 
6:   end for
7:    $\triangleright$  Compute new message
8:    $\eta'_{a \rightarrow i} \leftarrow \prod_{j \in V(a) \setminus i} \frac{\eta_{j \rightarrow a}^u}{\eta_{j \rightarrow a}^u + \eta_{j \rightarrow a}^s + \eta_j^0}$ 
9: end for
10: return  $\{\eta'_{a \rightarrow i}\}$ 

```

---

#### A.1 SP-Update

If we let  $C_a^s(i)$  to be the set of clauses where  $i$  appears with the same sign as in clause  $a$  and  $C_a^u(i)$  to be the remaining clauses, then the subroutine in Algorithm 3 provides the message passing equations required to update  $\eta_{a \rightarrow i}$ .

#### A.2 Marginalize

We can estimate the approximate marginals  $\mu_i(0), \mu_i(1), \mu_i(*)$  for each variable  $i$  by normalizing the following quantities so that they sum to one:

$$\mu_i(1) \propto \left[ 1 - \prod_{a \in C_-(i)} (1 - \eta_{a \rightarrow i}^*) \right] \prod_{a \in C_+(i)} (1 - \eta_{a \rightarrow i}^*) \quad (1)$$

$$\mu_i(0) \propto \left[ 1 - \prod_{a \in C_+(i)} (1 - \eta_{a \rightarrow i}^*) \right] \prod_{a \in C_-(i)} (1 - \eta_{a \rightarrow i}^*) \quad (2)$$

$$\mu_i(*) \propto \prod_{a \in C(i)} (1 - \eta_{a \rightarrow i}^*) \quad (3)$$

where  $C(i)$  denotes the set of clauses that  $i$  appears in and  $C_-(i)$  and  $C_+(i)$  are the clause subsets where  $i$  appears negated and unnegated respectively.
